# Supplementary material for: Natural transformation occurs independently of the essential actin-like MreB cytoskeleton in Legionella pneumophila
Source: PubMed Central journal article supplement (PMC4630621; doi:10.1038/srep16033), 2015-11-03
Supplement: srep16033-s1.pdf [file srep16033-s1.pdf]

## **Supplementary Material**

Natural transformation occurs independently of the essential actin-like MreB cytoskeleton in

*Legionella pneumophila*

Pierre-Alexandre Juan<sup>1,2</sup>, Laetitia Attaiech<sup>1,2</sup>, and Xavier Charpentier<sup>1,2\*</sup>

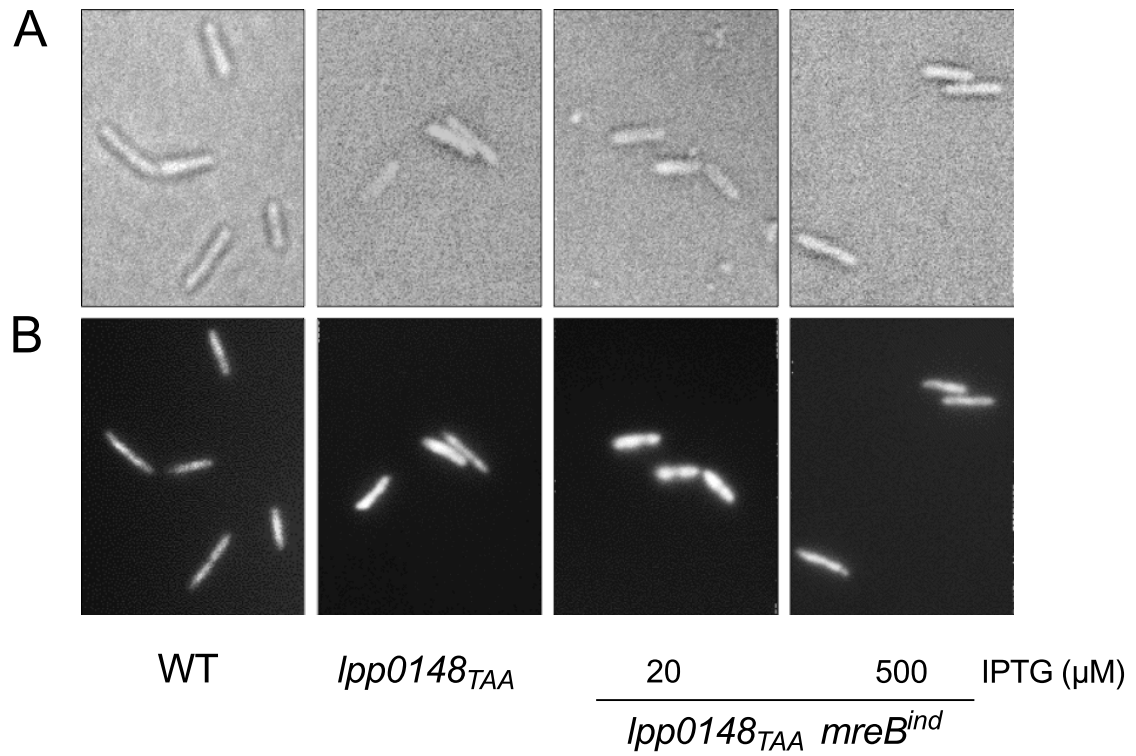

**Supplementary Figure S1.** Microscopy of *L. pneumophila* cells expressing various levels of *mreB* (see Figure 3). Bacteria were grown to exponential phase (OD 600nm = 1), fixed in 3% formaldehyde and DNA was stained with Hoescht 33288. A. Observation under bright light. B. Fluorescence imaging of DNA staining.

**A**

| <i>L. pneumophila</i> Paris |              | Isolated on                                |
|-----------------------------|--------------|--------------------------------------------|
| CDS mutation                | AA mutation  | [A22] ( $\mu\text{g}\cdot\text{ml}^{-1}$ ) |
| G725A                       | <b>G242D</b> | 25                                         |
| T71C                        | <b>I24T</b>  | 50                                         |
| A220C T221A                 | <b>M74Q</b>  | 50                                         |
| T244C                       | <b>F82L</b>  | 50                                         |
| C424G                       | <b>P142A</b> | 50                                         |
| G886A                       | <b>A296T</b> | 50                                         |
| T245C                       | <b>F82S</b>  | 100                                        |
| C338T                       | <b>P113L</b> | 100                                        |

**B**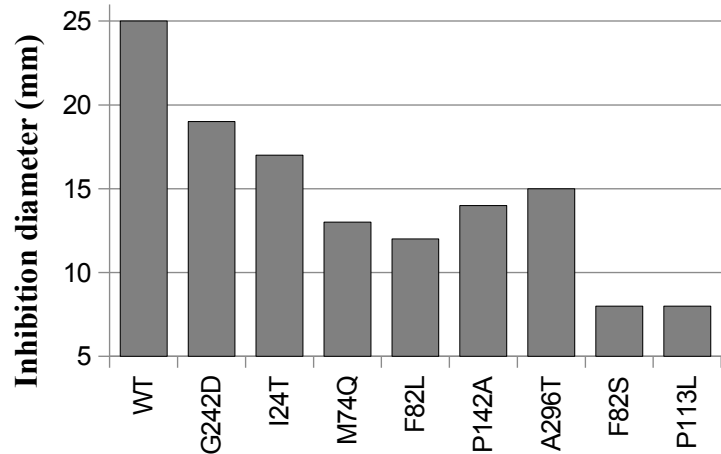**C**

|    |     |                       |                    |                             |                     |                  |           |          |     |
|----|-----|-----------------------|--------------------|-----------------------------|---------------------|------------------|-----------|----------|-----|
| Lp | 1   | MFRKLRGVFSSDLSI       | <b>DLGTANTLIYV</b> | RDKGIVLNEPSVVALRNE--SQQKRV  | 50                  |                  |           |          |     |
| Ec | 1   | MLKKFRGMFSDLSI        | DLGTANTLIYV        | KGQGIVLNEPSVVAIRQDRAGSPKSV  | 52                  |                  |           |          |     |
| Vc | 1   | MFKKLRGMFSDLSI        | DLGTANTLIYV        | KGQGIVLDEPSVVAIRQDKGRGGKTV  | 52                  |                  |           |          |     |
| Cc | 1   | MFSSLFGVISNDIAI       | <b>DLGTANTLIYQ</b> | KGKGIVLNEPSVVALRNV--GGRKVV  | 50                  |                  |           |          |     |
| Pa | 1   | MFKKLRGMFSSDLSI       | DLGTANTLIYV        | RERGIIVLNEPSVVAIRSH--GSQKSV | 50                  |                  |           |          |     |
|    |     |                       |                    |                             |                     |                  |           |          |     |
| Lp | 51  | AAVGLEAKRMLGRTPGNINAI | <b>RPMKDGVIADP</b> | FVTEKMLQHFHVKVHENK          | 100                 |                  |           |          |     |
| Ec | 53  | AAVGHDAKQMLGRTPGNIAAI | RPMKDGVIADF        | FVTEKMLQHFHFKQVHSNS         | 102                 |                  |           |          |     |
| Vc | 53  | AAVGHAAKQMLGRTPGNISAI | <b>RPMKDGVIADF</b> | YVTEKMLQHFIRQVHDNS          | 102                 |                  |           |          |     |
| Cc | 51  | HAVGIEAKQMLGRTPGHMEAI | RPMRDGVIADF        | EVAEEMIKYFIRKVNHRK          | 100                 |                  |           |          |     |
| Pa | 51  | VAVGTEAKRMLGRTPGNIAAI | RPMKDGVIADF        | SVCEKMLQYFINKVHENS          | 100                 |                  |           |          |     |
|    |     |                       |                    |                             |                     |                  |           |          |     |
| Lp | 101 | FLRPSPRVLV            | <b>CVPE</b>        | CGSTQVERRA                  | I                   | RESAMGAGAREVFLIE | <b>EP</b> | MAAALGSG | 150 |
| Ec | 103 | FMRPSPRVLV            | CVP                | VGATQVERRA                  | I                   | RESAQGAGAREVFLIE | EP        | MAAAIGAG | 152 |
| Vc | 103 | VLKPSPRVLV            | <b>CVPE</b>        | CGSTQVERRA                  | <b>I</b>            | RESALGAGAREVYLID | EP        | MAAAIGAG | 152 |
| Cc | 101 | GF-VNPKVIV            | <b>CVPE</b>        | SGATAVERRA                  | I                   | NDSCLNAGARRVGLID | <b>EP</b> | MAAAIGAG | 149 |
| Pa | 101 | FLQPSPRVLI            | <b>CVPE</b>        | CKSTQVERRA                  | I                   | RESALGAGAREVFLIE | EP        | MAAAIGAG | 150 |
|    |     |                       |                    |                             |                     |                  |           |          |     |
| Lp | 151 | MPVEEASGSMVV          | <b>DIGGGTTEVA</b>  | IISLSGIVY                   | <b>HQSVRIGGDKFD</b> | DAIVSYV          | 200       |          |     |
| Ec | 153 | LPVSEATGSMVV          | DIGGGTTEVA         | VISLNGVVY                   | SSSVRIGGDRFD        | EAIINYV          | 202       |          |     |
| Vc | 153 | LRVSEPTGSMVI          | <b>DIGGGTTEVA</b>  | VISLNGVVY                   | <b>SSSVRIGGDRFD</b> | EAIINYV          | 202       |          |     |
| Cc | 150 | LPIHEPTGSMVV          | <b>DIGGGTTEVA</b>  | VLISLSGIVY                  | <b>SRSVRVGGDKMD</b> | EAIISYM          | 199       |          |     |
| Pa | 151 | LPVEEARGSMVV          | DIGGGTTEVA         | LISLNGVVY                   | AESVRVGGDRFD        | EAIVTYV          | 200       |          |     |
|    |     |                       |                    |                             |                     |                  |           |          |     |
| Lp | 201 | RRNYGTLIGETTA         | <b>ERIKH</b>       | EIGSA-FPS-RDLFEIEVRGRNLAE   | <b>G</b>            | VPRSFTLT         | 250       |          |     |
| Ec | 203 | RRNYGSLIGEATA         | ERIKH              | EIGSA-YPG-DEVREIEVRGRNLAE   | G                   | VPRGFTLN         | 252       |          |     |
| Vc | 203 | RRNYGSLIGEATA         | <b>EKIKH</b>       | EIGSA-YPG-DDVQEIEVRGRNLAE   | G                   | VPRSFTLN         | 252       |          |     |
| Cc | 200 | RRHHNLLIGETTA         | <b>ERIKK</b>       | EIGTARAPADGEGLSIDVKGRDLMQ   | G                   | VPREVRIS         | 251       |          |     |
| Pa | 201 | RRNYGSLIGESTA         | ERIKQ              | EIGTA-FPG-GDVREVDVRGRNLAE   | G                   | VPRSFTLN         | 250       |          |     |
|    |     |                       |                    |                             |                     |                  |           |          |     |
| Lp | 251 | SAEILEALQEPLSGIVGAVRA | A                  | LAPPPELLAADI AERGMVLTGG     | <b>GA</b>           | LLKN             | 300       |          |     |
| Ec | 253 | SNEILEALQEPLTGIVSAVMV | A                  | LEQCPPELASDISERGMVLTGG      | GA                  | LLRN             | 302       |          |     |
| Vc | 253 | SNEILEALQEPLTGIVSAVMV | A                  | LEQCPPELASDISENGMVLTGG      | <b>GA</b>           | LLKD             | 302       |          |     |
| Cc | 252 | EKQAADALAEFVQIVEAVKV  | A                  | LEATPPELASDIADKGI MLTGG     | GA                  | LLRG             | 301       |          |     |
| Pa | 251 | SNEVLEALQESLATIVQAVKS | A                  | LEQSPPELASDIAERGLVLTGG      | GA                  | LLRD             | 300       |          |     |
|    |     |                       |                    |                             |                     |                  |           |          |     |
| Lp | 301 | IDTLLMEETGLPVLIAED    | <b>PLTCV</b>       | ARGGGKALETMDLRGGDFLSTE      | 345                 |                  |           |          |     |
| Ec | 303 | LDRLMEETGIPVVVAED     | PLTCV              | ARGGGKALEMIDMHGGDLFSEE      | 347                 |                  |           |          |     |
| Vc | 303 | LDRLMEETGIPVVIADD     | <b>PLTCV</b>       | ARGGGKALEMIDMHGGDLFSEE      | 347                 |                  |           |          |     |
| Cc | 302 | LAEIRDHTGLPVTVADDP    | LSCVA              | LGCGKVL EHPKMMKVLESTLA      | 346                 |                  |           |          |     |
| Pa | 301 | LDKLLAQETGLPVIVAEE    | <b>PLTCV</b>       | ARGGGRALEMMDRHSMDLLSTE      | 345                 |                  |           |          |     |

**Supplementary Figure S2.** A. Table of *mreB* spontaneous mutations obtained while selecting for A22-resistant mutants. B. A22 susceptibility of the A22-resistant MreB mutants determined by disk diffusion assay. C. Alignment of the amino acid sequence of MreB protein of *L. pneumophila* Paris (Lp) with sequences of its homologs in *E. coli* (Ec), *V. cholerae* (Vc), *C. crescentus* (Cc) and *P. aeruginosa* (Pa). The amino acids altered in A22-resistant MreB mutants are presented on a black background (for *L. pneumophila*) or gray background (for the other species). Alterations positions are boxed for easier identification. For each species, the ATP binding pocket is shown by the amino acids colored in red (only for *L. pneumophila*).

## Natural transformation occurs independently of the essential actin-like MreB cytoskeleton in *Legionella pneumophila*

### Supplementary table S1 – List of primers used in this study

#### Primers for the construction of lpp0148 and lpp2773 mutant strains

| Name          | Description/Use                                                                                                                             | Sequence (5' - 3')                                   |
|---------------|---------------------------------------------------------------------------------------------------------------------------------------------|------------------------------------------------------|
| lpp0148_P1    | Forward primer to amplify a 2kb fragment upstream of lpp0148                                                                                | GCCGTTTTAAATCGGCCAGAAAG                              |
| lpp0148_P2    | Reverse primer to amplify a 2kb fragment upstream of lpp0148. Underlined sequence is complementary to the 5' end of the kan-sacB cassette   | GGCCCAATTCGCCCTATATAGTGAIGTCGACAGGCAAGCCAGATATCAAGAC |
| lpp0148_P3    | Forward primer to amplify a 2kb fragment downstream of lpp0148. Underlined sequence is complementary to the 3' end of the kan-sacB cassette | GGGTTTTGCTCGGGTCCGGTGGCATAITGAAGCTCGTGAAGTCCGATCG    |
| lpp0148_P4    | Reverse primer to amplify a 2kb fragment downstream of lpp0148.                                                                             | CTTCCCCCTAAAAATCAGGATGTC                             |
| lpp0148TAA_P2 | Reverse primer used with lpp0148_P1 to amplify the 5' end of lpp0148                                                                        | GCTTATTGATGACTTAAGCGGTTGTTGG                         |
| lpp0148TAA_P3 | Forward primer used with lpp0148_P4 to amplify the 3' end of lpp0148                                                                        | CCACAGAACCCTTAAAGTCATCAATAAAGC                       |
| lpp2773_P1    | Forward primer to amplify a 2kb fragment upstream of lpp2773                                                                                | GGCGATTTGGCATTGATGCTC                                |
| lpp2773_P2    | Reverse primer to amplify a 2kb fragment upstream of lpp2773. Underlined sequence is complementary to the 5' end of the kan-sacB cassette   | GGCCCAATTCGCCCTATATAGTGAIGTCGCCATCCTGGCGAAAACATTTAG  |
| lpp2773_P3    | Forward primer to amplify a 2kb fragment downstream of lpp2773. Underlined sequence is complementary to the 3' end of the kan-sacB cassette | GGGTTTTGCTCGGGTCCGGTGGCATAITGTTTTGTTGGTGAACCCCTAATG  |
| lpp2773_P4    | Reverse primer to amplify a 2kb fragment downstream of lpp2773.                                                                             | ACGCTTTGTCGATTTGCTGGGTTG                             |
| lpp2773TAA_P2 | Reverse primer used with lpp2773_P1 to amplify the 5' end of lpp2773                                                                        | CGCAAGCGGTAATTAAGCAAACTGTTTTG                        |
| lpp2773TAA_P3 | Forward primer used with lpp2773_P4 to amplify the 3' end of lpp2773                                                                        | CAAAAACAGTTTGGCTTAAATACCGCTTGGC                      |
| lpp0148seqF   | Sequencing primer for verification of the mutant strain                                                                                     | CTATCATACATTCAAGGTCAACAGAAC                          |
| lpp0148seqR   | Sequencing primer for verification of the mutant strain                                                                                     | TTTGGCGCACCCCATATATGGAG                              |
| lpp2773seqF   | Sequencing primer for verification of the mutant strain                                                                                     | CCITCAAGTAACATCACGCTCCG                              |
| lpp2773seqR   | Sequencing primer for verification of the mutant strain                                                                                     | GAGTGGAGCACATATCTTTTGAAGC                            |

#### Primers for the construction of the mreB mutant strain

| Name          | Description/Use                                                                                                                                                                                                 | Sequence (5' - 3')                                                                                 |
|---------------|-----------------------------------------------------------------------------------------------------------------------------------------------------------------------------------------------------------------|----------------------------------------------------------------------------------------------------|
| mreBseqF      | Forward primer for sequencing of <i>mreB</i> (lpp0873)                                                                                                                                                          | CCGGTTAAAAAGCAGTTGTCTGG                                                                            |
| mreBseqR      | Reverse primer for sequencing of <i>mreB</i> (lpp0873)                                                                                                                                                          | CCCAGAGAAGCTGTGCCGCC                                                                               |
| mreBseq_Fw    | Forward primer to sequence <i>mreB</i> (lpp0873)                                                                                                                                                                | GATAAAAATTTATATGCGGCAACTGTC                                                                        |
| mreBseq_IntFw | Forward primer to amplify a 2kb fragment upstream of <i>mreB</i> (lpp0873)                                                                                                                                      | GTCCGCAATTATTACATAAGTGAATAG                                                                        |
| lpp0873_P1    | Forward primer to amplify a 2kb fragment upstream of <i>mreB</i> (lpp0873). The underlined sequence is complementary to 5' end of the gentamicin resistance gene                                                | CCAGGATTTGGAAATAAAGCGTTG                                                                           |
| 0873-plac-P2  | Reverse primer to amplify a 2kb fragment upstream of <i>mreB</i> (lpp0873). The underlined sequence is complementary to 5' end of the gentamicin resistance gene and the <i>lacIq</i> gene                      | TTCCAGCGTGTGCGTCCATGGCCAAATTTGCCGATAAGAATTTATACACC                                                 |
| gnt-F         | Forward primer to amplify a 2.3kb cassette containing the gentamicin resistance gene and the <i>lacIq</i> gene                                                                                                  | TTGCCCATGGAGCGCACACCGTG                                                                            |
| lacIq-R1      | Reverse primer to amplify a cassette containing the gentamicin resistance gene and <i>lacIq</i> gene. The underlined sequence is complementary to the IPTG-inducible promoter                                   | ATTATATTTGTTATTCGGCTCACCAATAAAGCAAAAGAACCGTTATGATGTGGCGG                                           |
| 0873-plac-P3  | Forward primer to amplify a 2kb fragment starting at the <i>mreB</i> (lpp0873). The primer carries the IPTG-inducible promoter. The underlined sequences are <i>lacO</i> sites and -35 and -10 box are in bold. | <b>TTGCTT</b> ATTGTGAGCGGATAAACA <b>TTATA</b> TTGTGAGGCGGATAACA <b>ATTCTG</b> TCGATTTTATCCAATATAGG |
| lpp0873_P4    | Reverse primer to amplify a 2kb fragment downstream of <i>mreB</i> (lpp0873)                                                                                                                                    | GGCGAATTACCCGAACAACACTCTC                                                                          |

#### Probes for Northern-blot

| Name     | Description                                                             | Sequence (5' - 3')                               |
|----------|-------------------------------------------------------------------------|--------------------------------------------------|
| comE2-NB | 5' and 3' biotinylated probe for the detection of the <i>comE2</i> mRNA | CTACAAAACGGCTGCCCTAATACCTTGACTTCCGCAAGCTTTCCAGAG |
| mreB-NB  | 6' and 3' biotinylated probe for the detection of the <i>mreB</i> mRNA  | CCTACAGCGGCGACACGCTTCTGGCCTGATTCAATTACGCAATGCC   |
